# Supplementary material for: Development of microglia-targeting adeno-associated viral vectors as tools to study microglial behavior in vivo
Source: PubMed Central journal article supplement (PMC9652230; doi:10.1038/s42003-022-04200-3), 2022-11-11
Supplement: 42003_2022_4200_MOESM3_ESM.pdf [file 42003_2022_4200_MOESM3_ESM.pdf]

## Description of Additional Supplementary Files

**File name:** Supplementary Data 1

**Description:** Source data.

**File name:** Supplementary Video 1

**Description:** This video provides supplementary information to Figure 6a.

**File name:** Supplementary Video 2

**Description:** This video provides supplementary information to Figure 6a.

**File name:** Supplementary Video 3

**Description:** This video provides supplementary information to Figure 6a.

**File name:** Supplementary Video 4

**Description:** This video provides supplementary information to Figure 6b.

**File name:** Supplementary Video 5

**Description:** This video provides supplementary information to Figure 6b.

**File name:** Supplementary Video 6

**Description:** This video provides supplementary information to Figure 7d.

**File name:** Supplementary Video 7

**Description:** This video provides supplementary information to Figure 7d.

**File name:** Supplementary Video 8

**Description:** This video provides supplementary information to Figure 7d.
